# Supplementary material
Source: PubMed Central journal article supplement (PMC3306236)
Supplement: NIHMS359979-supplement-01.pdf [file NIHMS359979-supplement-01.pdf]

## Supplementary Table 1.

### Significant Compounds Following Supervised Pharmacologic Analysis of BRAF(V600E) Mutation in NCI60 Cancer Cell Lines<sup>a</sup>.

| NSC Number | Name                                                                                                 | Nominal <i>p</i> value | FDR <sup>b</sup> | T-score  |
|------------|------------------------------------------------------------------------------------------------------|------------------------|------------------|----------|
| 354462     | Hypothemycin <sup>c</sup>                                                                            | 1.66E-11               | 7.27E-07         | -8.60701 |
| 706829     | 1,6-Bis[4-(4-aminophenoxy)phenyl]diamantane                                                          | 8.10E-11               | 1.78E-06         | -8.24454 |
| 678518     | Protein: LF <sup>c</sup>                                                                             | 1.17E-07               | 1.71E-03         | -6.46505 |
| 658874     |                                                                                                      | 3.12E-07               | 2.74E-03         | -5.95796 |
| 669995     |                                                                                                      | 3.12E-07               | 2.74E-03         | -5.88385 |
| 701104     |                                                                                                      | 5.07E-07               | 3.71E-03         | -5.76488 |
| 600391     | Antibiotic 2-79-A                                                                                    | 3.17E-06               | 1.81E-02         | -5.23291 |
| 656082     |                                                                                                      | 3.72E-06               | 1.81E-02         | -5.38308 |
| 706031     |                                                                                                      | 9.09E-06               | 3.99E-02         | -4.93085 |
| 165572     | Pyrido[3,2-g]quinoline-2,5,8,10(1H,9H)-tetrone                                                       | 1.20E-05               | 4.78E-02         | -4.86143 |
| 661940     | 2-(2-chloroethoxy)naphthazarin                                                                       | 1.58E-05               | 5.76E-02         | -4.77118 |
| 708551     |                                                                                                      | 2.34E-05               | 7.91E-02         | -4.65508 |
| 644211     | Chlorodestruxin                                                                                      | 2.67E-05               | 8.37E-02         | -4.63522 |
| 708550     |                                                                                                      | 3.74E-05               | 1.03E-01         | -4.51708 |
| 679828     | 2-(2-Amino-3-methoxyphenyl)-chromen-4-one (PD98059) <sup>c</sup>                                     | 3.78E-05               | 1.03E-01         | -4.52208 |
| 602617     | Benzo[g]quinoxaline-5,10-dione                                                                       | 4.43E-05               | 1.03E-01         | -4.46683 |
| 661413     | 2-(2-Methoxyethoxy)naphthazarin                                                                      | 4.58E-05               | 1.03E-01         | -4.45647 |
| 664213     | Chlorotetrangulol                                                                                    | 4.66E-05               | 1.03E-01         | -4.46837 |
| 674092     | Quinoline-4-carboxamide,N,N'-[(1,4-piperazinediyl)bis(3,1-propanediyl)]bis(2-phenyl) dihydrochloride | 4.70E-05               | 1.03E-01         | -4.44895 |
| 322921     | Pibenzimol-HCl; Hoechst dye                                                                          | 5.01E-05               | 1.05E-01         | -4.42970 |
| 661416     | 2-(2-(2-Methoxyethoxy)ethoxy)naphthazarin                                                            | 8.10E-05               | 1.50E-01         | -4.30846 |
| 661941     | 2-(3-chloropropoxy)naphthazarin                                                                      | 8.20E-05               | 1.50E-01         | -4.28875 |
| 644902     | Benzo[b]naphtho[2,3-d]furna-6,11-diome, 4-chloro-3-hydroxy                                           | 9.69E-05               | 1.67E-01         | -4.23074 |
| 622580     |                                                                                                      | 1.03E-04               | 1.67E-01         | -4.28922 |
| 658450     | 2-Acetamido-6-methyl-8-hydroxy-1,4-naphthaquinone                                                    | 1.11E-04               | 1.74E-01         | -4.18882 |
| 622582     |                                                                                                      | 1.17E-04               | 1.77E-01         | -4.24785 |
| 685981     | 1,4-Butanediamine,N,N'-bis[(2-naphthalenyl)methyl-N,N'-bis[3-[(trifluoroacetyl)amino]propyl]         | 1.21E-04               | 1.77E-01         | -4.20039 |
| 686324     | 1-Methyl-3-(4-[2-dimethylaminoethoxy]phenyl)-2-phenylindolizine                                      | 1.25E-04               | 1.77E-01         | -4.15329 |
| 697177     |                                                                                                      | 1.32E-04               | 1.81E-01         | -4.18153 |
| 622688     | 3H-1,2,4-Dithiazole-5-amine,3-[2-(diethoxyethyl)imino-N,N-dimethyl-,hydrobromide                     | 1.53E-04               | 2.03E-01         | -4.09139 |
| 090829     |                                                                                                      | 1.78E-04               | 2.19E-01         | -4.04392 |
| 674085     |                                                                                                      | 1.80E-04               | 2.19E-01         | -4.04030 |

|        |                                                                              |          |          |          |
|--------|------------------------------------------------------------------------------|----------|----------|----------|
| 626482 | 1,5,10-Trihydroxy-7-methoxy-3-methyl-1H-naphtho[2,3-c]pyran-6,9-dione        | 1.85E-04 | 2.19E-01 | -4.03264 |
| 661193 | Propanamide, 2-[4-[[4-chlorophenyl]carbonyl]-2-chlorophenoxy]-2-methyl-      | 2.08E-04 | 2.39E-01 | -3.99526 |
| 625502 | 4-Morpholinecarbodithioic acid, antimony complex                             | 2.12E-04 | 2.39E-01 | -3.98909 |
| 676180 |                                                                              | 2.26E-04 | 2.42E-01 | -3.97585 |
| 678883 | Pyrimidin-2-amine,4-(5-chloro-2-hydroxyphenyl)-6-phenyl-N-(phenylmethylene)- | 3.36E-06 | 1.81E-02 | 5.21642  |
| 671526 | Toxin-.delta.53L                                                             | 6.12E-05 | 1.22E-01 | 4.37744  |
| 704408 |                                                                              | 1.02E-04 | 1.67E-01 | 4.23034  |
| 094889 | Gardenin A                                                                   | 1.81E-04 | 2.19E-01 | 4.05136  |
| 676495 |                                                                              | 2.23E-04 | 2.42E-01 | 3.98056  |

<sup>a</sup>Compounds in black font demonstrated significantly greater potency against the BRAF(V600E) cell line class; those in red font exhibited significantly less potency (e.g., the BRAF(V600E) class was resistant to these compounds).

<sup>b</sup>FDR = false discovery rate (q value), which was set at 0.25 (see Methods; Reference: Benjamini, Y. and Hochberg, Y., Journal of the Royal Statistical Society. Series B (Methodological), 1995. 57(1): p. 289-300).

<sup>c</sup>Compounds known to inhibit MEK.
