# Supplementary material
Source: PubMed Central journal article supplement (PMC3306236)

# Solit et al., Supplemental Figure S1

## MALME 3M (BRAF/V600E)

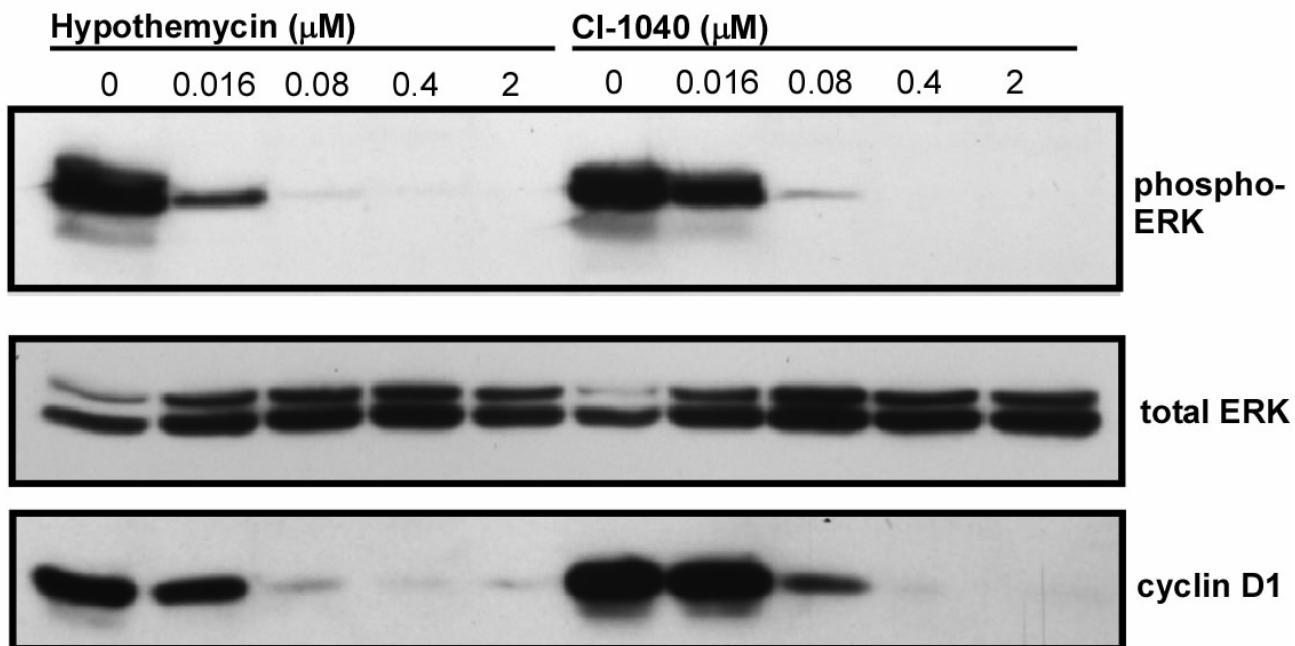

Supplement: NIHMS359979-supplement-Supplementary_Figure_1.pdf [file NIHMS359979-supplement-Supplementary_Figure_1.pdf]

# Solit et al., Supplemental Figure S2

**a**

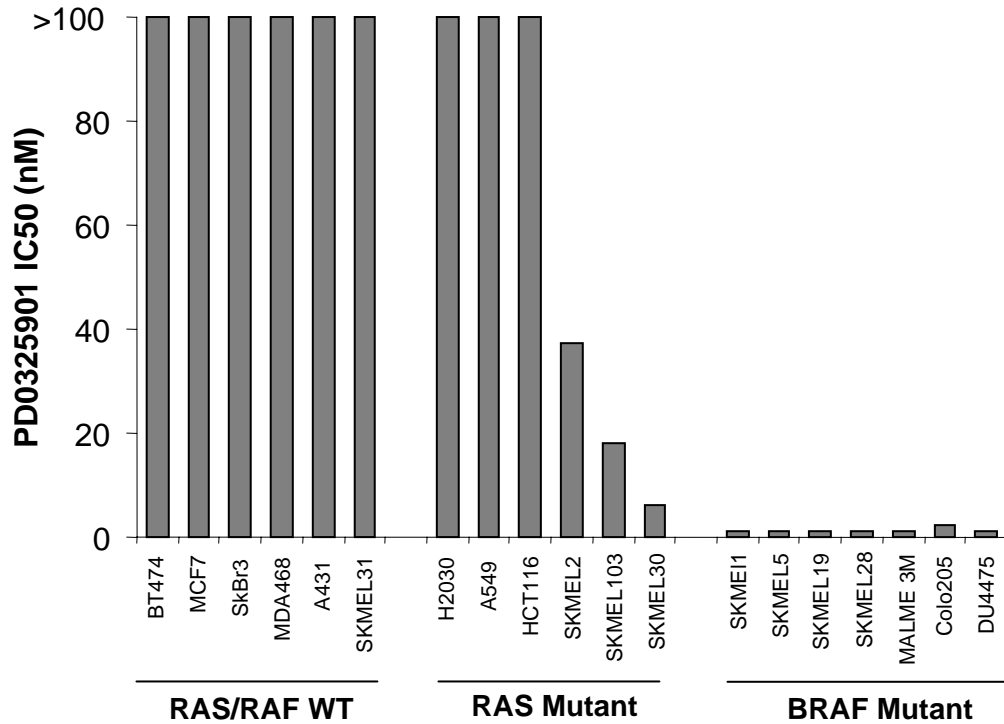

**b**

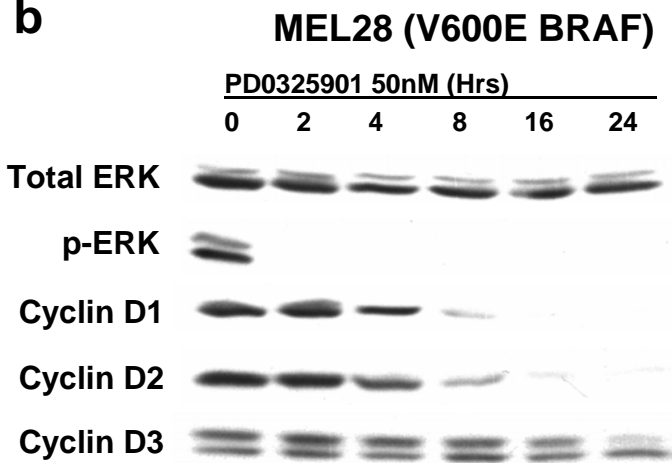

**c**

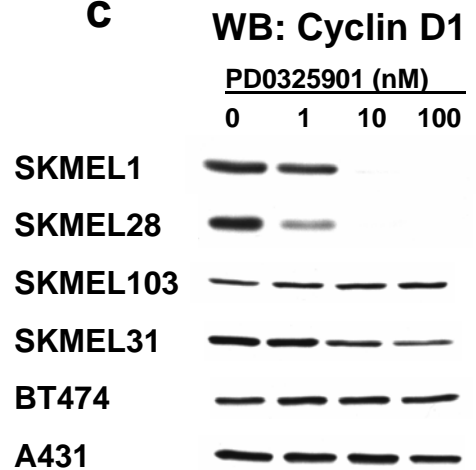

Supplement: NIHMS359979-supplement-Supplementary_Figure_2.pdf [file NIHMS359979-supplement-Supplementary_Figure_2.pdf]

# Solit et al., Supplemental Figure S3

**a**

## Colo205 (V600E BRAF)

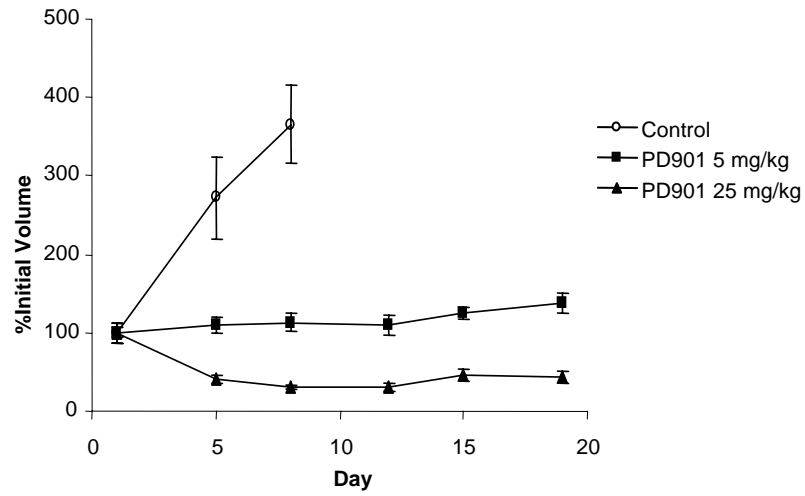

**b**

## MEL30 (Q61R NRAS)

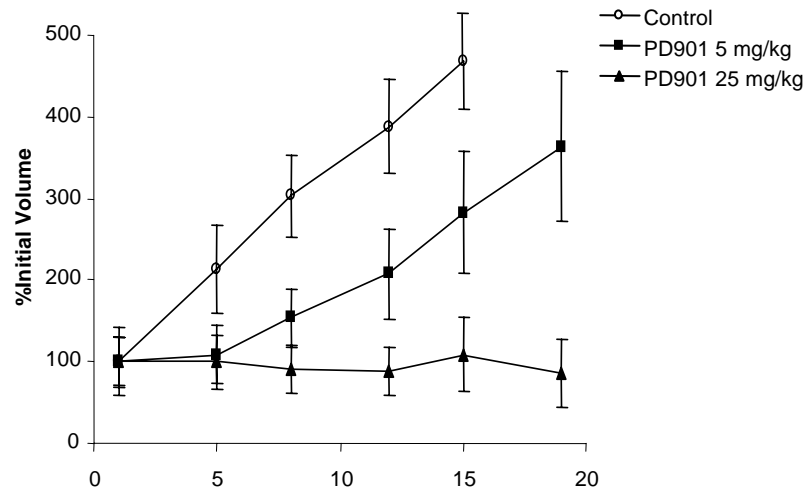

Supplement: NIHMS359979-supplement-Supplementary_Figure_3.pdf [file NIHMS359979-supplement-Supplementary_Figure_3.pdf]

# Solit et al., Supplemental Figure S4

**a**

## Control Xenografts

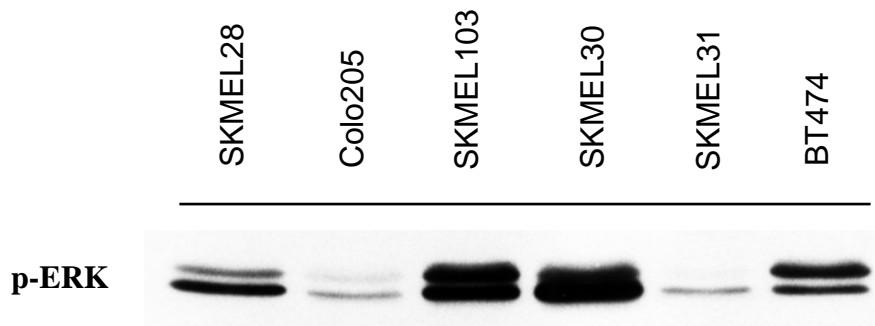

**b**

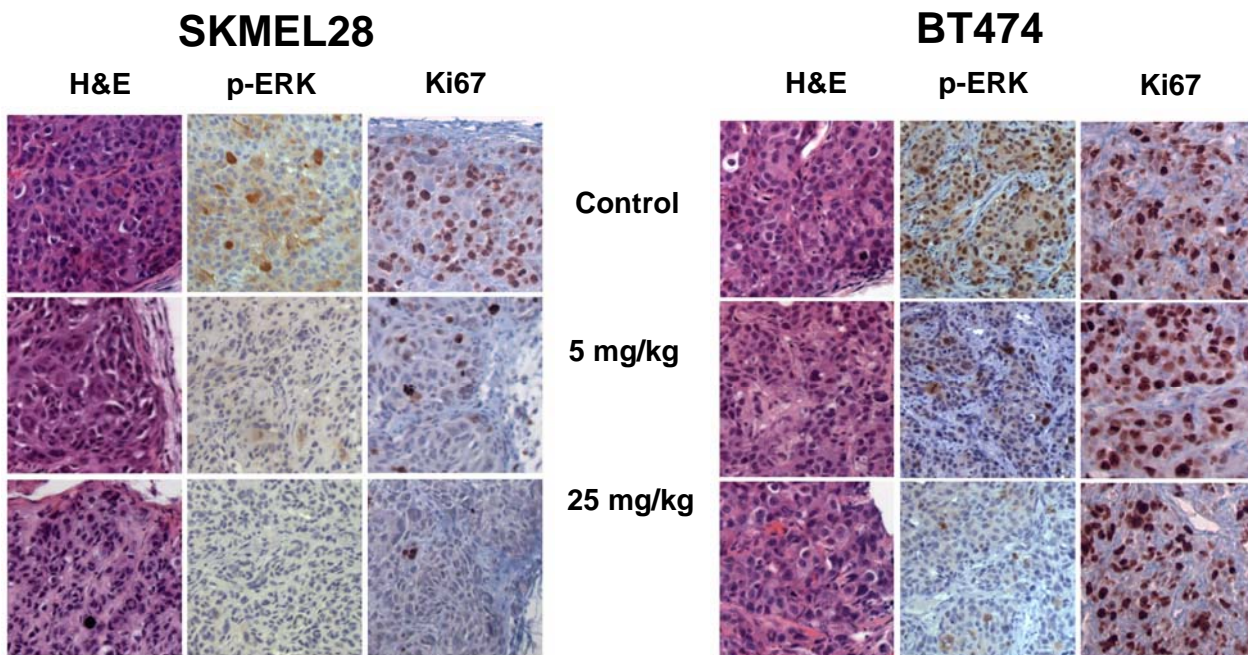

Supplement: NIHMS359979-supplement-Supplementary_Figure_4.pdf [file NIHMS359979-supplement-Supplementary_Figure_4.pdf]
